# Supplementary material for: Selective electrochemical hydrogenation of furfural to 2-methylfuran over a single atom Cu catalyst under mild pH conditions
Source: Royal Society of Chemistry journal article supplement (doi:10.1039/d0gc03999c), 2021-01-01
Supplement: d0gc03999c1.pdf [file d0gc03999c1.pdf]

# Selective electrochemical hydrogenation of furfural to 2-methylfuran over a single atom Cu catalyst under mild pH conditions

Peng Zhou,<sup>a</sup> Yu Chen,<sup>b</sup> Peng Luan,<sup>a</sup> Xiaolong Zhang,<sup>a</sup> Ziliang Yuan,<sup>c</sup> Si-Xuan Guo,<sup>a</sup> Qinfen Gu,<sup>d\*</sup> Bernt Johannessen,<sup>d</sup> Mamun Mollah,<sup>a</sup> Alan L. Chaffee,<sup>a</sup> David R. Turner<sup>a</sup> and Jie Zhang<sup>\*a</sup>

<sup>a</sup>School of Chemistry, Monash University, Wellington Road, Clayton 3800, Victoria, Australia.

<sup>b</sup>Monash Center for Electron Microscopy, Monash University, Wellington Road, Clayton 3800, Victoria, Australia.

<sup>c</sup> School of Chemistry, South-Central University for Nationalities, Wuhan, China.

<sup>d</sup> Australian Synchrotron, ANSTO, 800 Blackburn Rd, Clayton VIC 3168

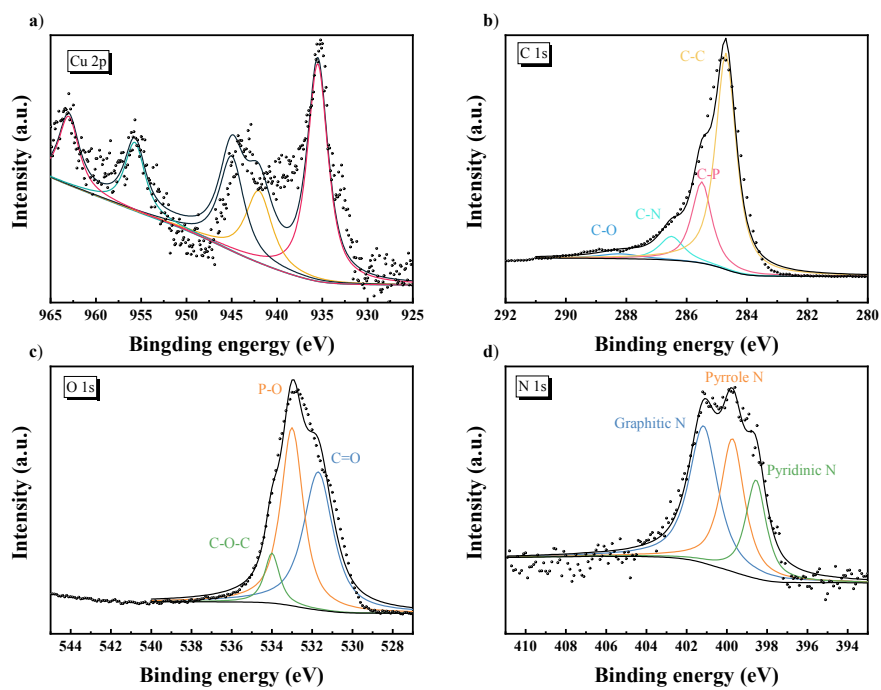

**Figure S1.** High resolution XPS spectra of Cu<sub>1</sub>/PC. a) Cu 2p orbital; b) C 1s orbital; c) O 1s orbital; d) N 1s orbital.

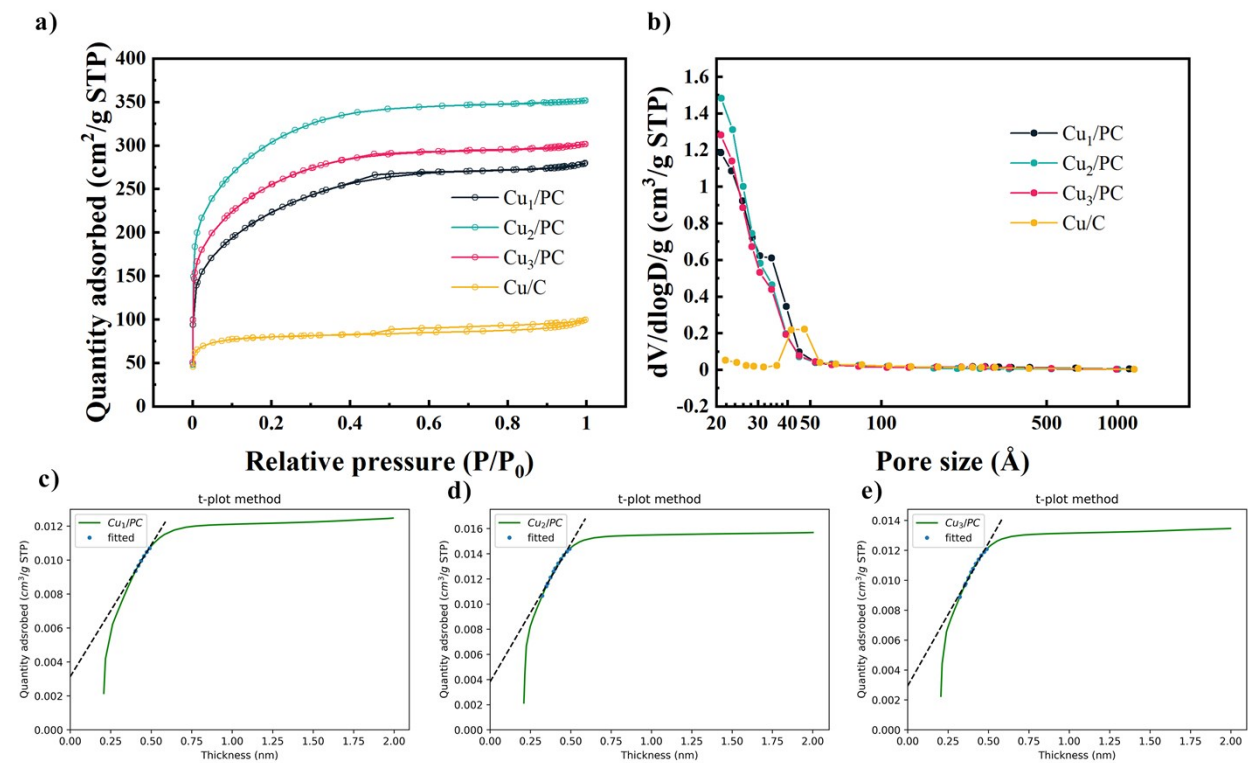

**Figure S2.** a) N<sub>2</sub> adsorption-desorption isotherms, b) pore size distributions of the Cu<sub>x</sub>/PC and Cu/C samples, and t-plot analysis for Cu<sub>1</sub>PC (c), Cu<sub>2</sub>PC (d), Cu<sub>3</sub>PC using the Harkins and Jura thickness model.

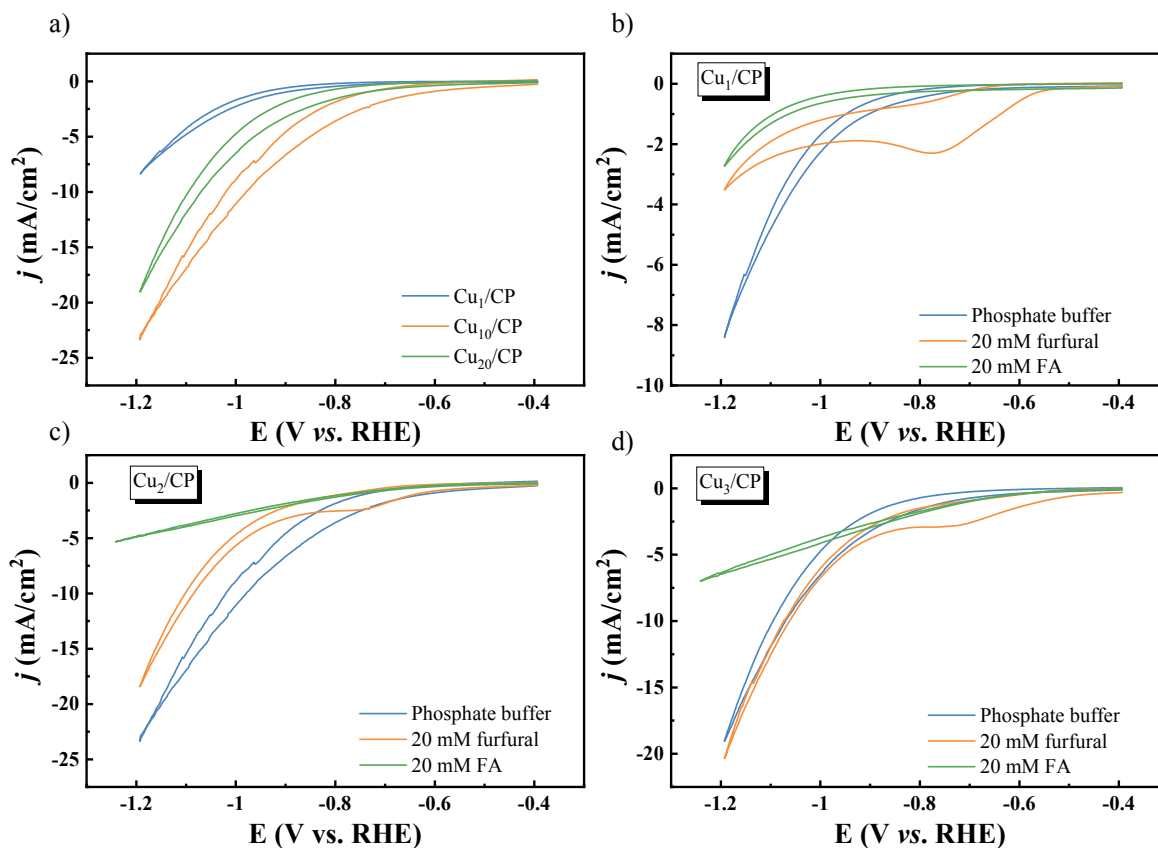

**Figure S3.** Voltammetric data for the  $\text{Cu}_x/\text{PC}$  catalysts in a) phosphate buffer (pH = 8), and b-d) phosphate buffer (pH = 8) in the presence and absence of furfural or FA. Scan rate =  $50 \text{ mV s}^{-1}$ .

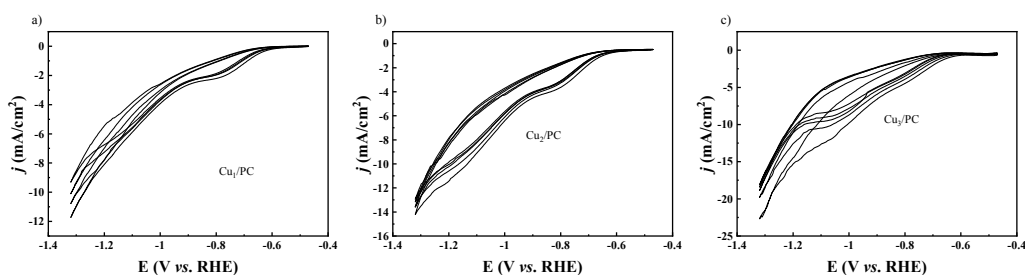

**Figure S4** Multi-cycle cyclic voltammograms recorded in a  $\text{N}_2$ -saturated acetate buffer solution (pH 5) containing 20 mM furfural using a)  $\text{Cu}_1/\text{PC}$  b)  $\text{Cu}_2/\text{PC}$  c)  $\text{Cu}_3/\text{PC}$  modified GC electrodes. Scan rate =  $50 \text{ mV s}^{-1}$ .

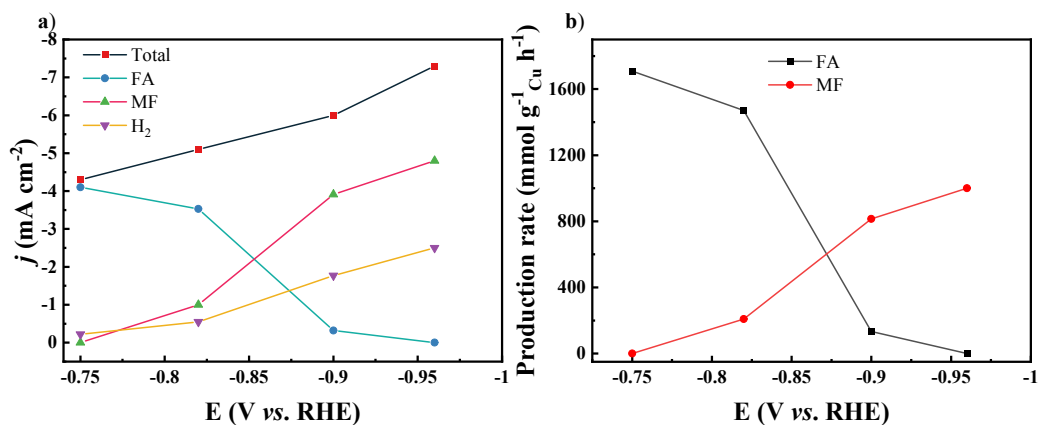

**Figure S5.** a) Total current density and partial current density for H<sub>2</sub>, FA and MF and b) Production rate of FA and MF at Cu<sub>1</sub>/PC in electrolysis experiment with Cu<sub>1</sub>/PC at various applied potentials in acetate buffer (pH = 5).

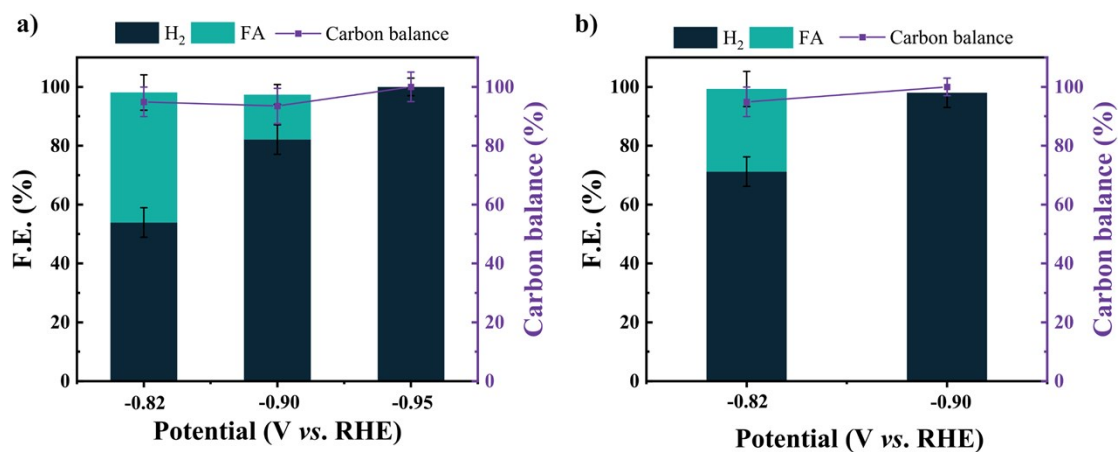

**Figure S6.** The faraday efficiency and carbon balance data for the bulk electrolysis of 40 mM furfural in an acetate buffer solution (pH = 5) on a) Cu<sub>2</sub>/PC, and b) Cu<sub>3</sub>/PC at various applied potentials after consuming 10 C of charge.

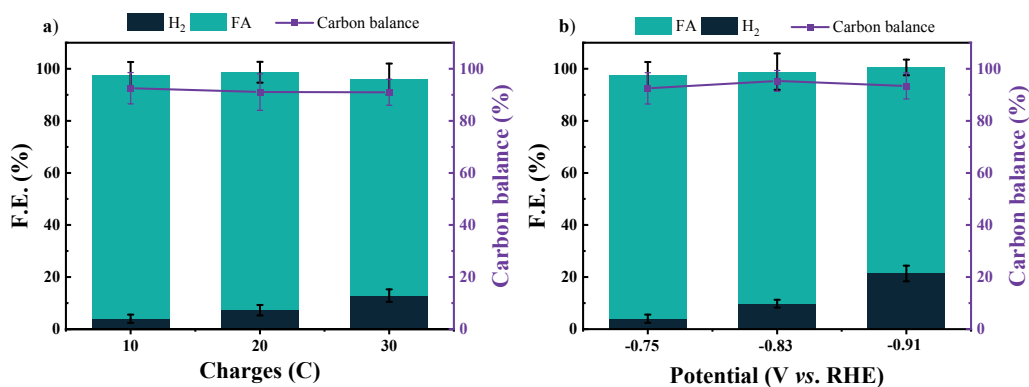

**Figure S7.** The faraday efficiency and carbon balance data for the bulk electrolysis of 40 mM furfural in a phosphate buffer solution (pH = 8) with Cu<sub>1</sub>/PC a) after consuming various amounts of charge at an applied potential of -0.75 V vs. RHE, and b) at various applied potential potentials after consuming 10 C of charge.

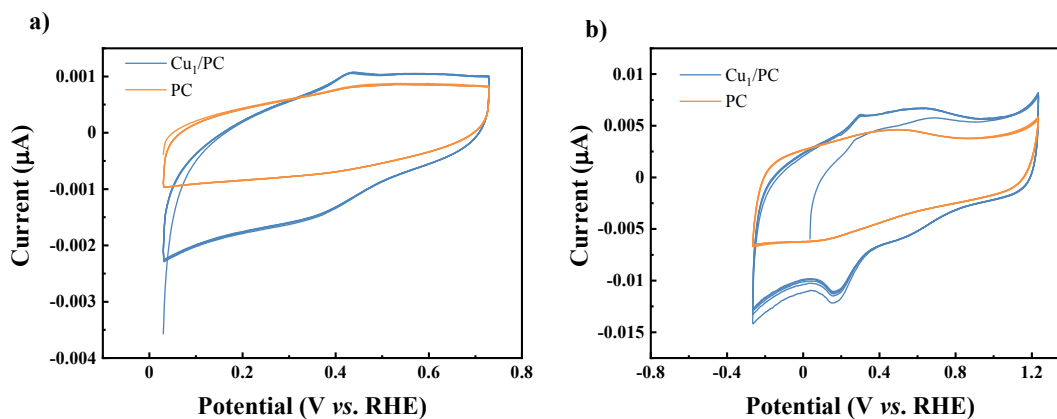

**Figure S8.** Cyclic voltammograms obtained on the Cu<sub>1</sub>/PC and PC modified electrodes in a) acetate buffer (pH = 5), and b) 0.01 M H<sub>2</sub>SO<sub>4</sub> aqueous solutions. Scan rate = 50 mV s<sup>-1</sup>.

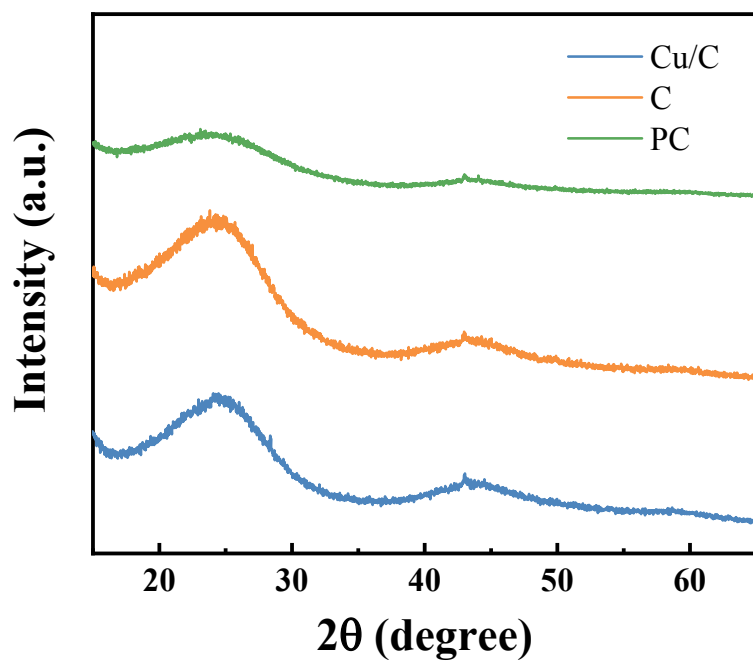

Figure S9. XRD patterns for Cu/C, C and PC.

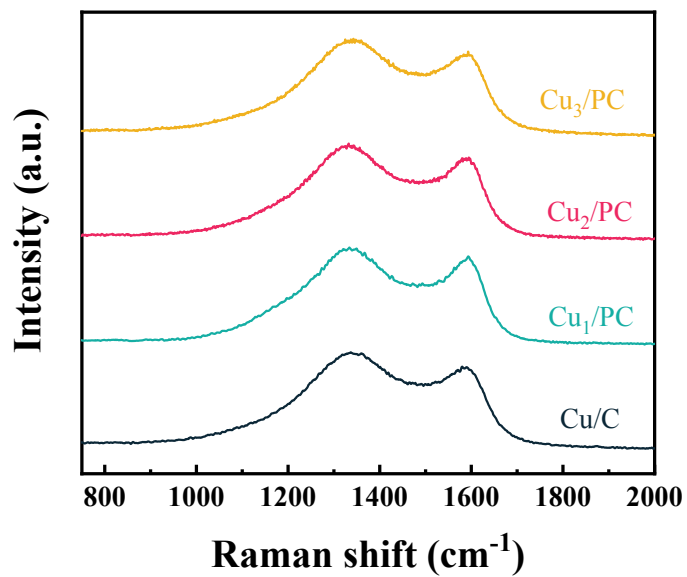

Figure S10. Raman spectra for Cu<sub>x</sub>/PC and Cu/C.

**Table S1** Elemental composition of Cu<sub>1</sub>/PC

| Element | Composition (mass %) |                    |
|---------|----------------------|--------------------|
|         | XPS                  | Elemental analysis |
| C       | 61.3                 | 32.6               |
| O       | 22.2                 | 37.3               |
| N       | 4.5                  | 8.1                |
| P       | 10.4                 | 19.5 <sup>a</sup>  |
| H       | -                    | 2.0                |

<sup>a</sup> Estimated by subtracting other element in the sample.

**Table S2.** Parameters of the best Cu K-edge EXAFS fitting results for Cu<sub>1</sub>/PC.

| Shell             | CN  | R    | $\sigma^2$ | e0     |
|-------------------|-----|------|------------|--------|
| Cu-O <sub>1</sub> | 4.0 | 1.95 | 0.00325    | -2.371 |
| Cu-O <sub>2</sub> | 2.0 | 2.95 | 0.00273    | -2.371 |

**Table S3.** Summary of texture parameters for Cu<sub>x</sub>/PC.

| Sample              | Surface area (BET) <sup>a</sup><br>(m <sup>2</sup> g <sup>-1</sup> ) | Pore diameter (nm) | (BJH) <sup>b</sup> | Pore volume (BJH) <sup>c</sup> (cm <sup>3</sup> g <sup>-1</sup> ) | Microporous area (m <sup>2</sup> g <sup>-1</sup> ) <sup>d</sup> |
|---------------------|----------------------------------------------------------------------|--------------------|--------------------|-------------------------------------------------------------------|-----------------------------------------------------------------|
| Cu/C                | 245                                                                  | 5.09               |                    | 0.05                                                              | -                                                               |
| Cu <sub>1</sub> /PC | 751                                                                  | 2.78               |                    | 0.25                                                              | 212                                                             |
| Cu <sub>2</sub> /PC | 997                                                                  | 2.61               |                    | 0.25                                                              | 235                                                             |
| Cu <sub>3</sub> /PC | 844                                                                  | 2.68               |                    | 0.23                                                              | 181                                                             |

<sup>a</sup> Specific surface area, calculated from multi-point BET analysis.

<sup>b</sup> The pore diameter calculated from the adsorption part of isotherm using the BJH method.

<sup>c</sup> Total pore volume calculated from the BJH method.

<sup>d</sup> Calculated from t-plot with the equation:  $S_{mic} = S_{BET} - S_{mes+ext}$  in which  $S_{mic}$  and  $S_{BET}$  represent the microporous area and BET surface area,  $S_{mes+ext}$  are obtained from t-plot<sup>51</sup>.



**Table S4.** Effect of the substrate and product concentration on the F.E. of the products.<sup>a</sup>

| Entry          | Substrates          | F.E. (%)       |     |      |
|----------------|---------------------|----------------|-----|------|
|                |                     | H <sub>2</sub> | FA  | MF   |
| 1              | 40 mM FF            | 29.1           | 5.0 | 62.7 |
| 2              | 40 mM FF + 10 mM FF | 18.2           | 7.9 | 74.1 |
| 3 <sup>b</sup> | 40 mM FF + 10 mM FA | 23.7           | 6.3 | 70.2 |
| 4              | 40 mM FF + 10 mM MF | 27.9           | 5.4 | 60.9 |

<sup>a</sup> Conducted in acetate buffer (pH = 5) at -0.90 V vs. RHE and 10 C of charge were collected.

<sup>b</sup> Assuming MF to be the 4 e<sup>-</sup> reduction product of FF since the concentration of FF and FE of MF from FF reduction are significantly higher.

**Table S5.** Comparison of our catalyst with the state-of-the-art furfural electrochemical hydrogenation catalysts.

| Catalysts                | pH                             | Potential<br>(V vs.RHE) | F.E. (%)           | Carbon balance (%) | Reference |
|--------------------------|--------------------------------|-------------------------|--------------------|--------------------|-----------|
| Cu <sub>1</sub> /PC      | 5                              | -0.75                   | 94 <sup>a</sup>    | 100                | This work |
| Cu <sub>1</sub> /PC      | 5                              | -0.90                   | 62 <sup>b</sup>    | 100                | This work |
| Cu/Cu-400nm              | 0                              | -0.5                    | 73 <sup>b</sup>    | 67                 | S2        |
| Cu                       | 0                              | NA                      | 56.8 <sup>c</sup>  | < 70               | S3        |
| Ni                       | 1                              | NA                      | 39 <sup>b</sup>    | 79                 | S4        |
| Pd/C or Pt/C             | 7                              | -1.15- -1.75            | 24-30 <sup>c</sup> | 10                 | S5        |
| Cu                       | 10                             | -1.4                    | 71 <sup>c</sup>    | NA                 | S6        |
| Pb, Ni, Fe, Ti, C,<br>Pt | 10                             | -1.4                    | < 40 <sup>c</sup>  | NA                 | S6        |
| CuP <sub>3</sub> /CFC    | 1.0 M<br>KOH<br>(pH =<br>13.5) | -1.5                    | > 95 <sup>a</sup>  | 100                | S7        |
| NiP <sub>3</sub> /CFC    | 1.0 M<br>KOH<br>(pH =<br>13.5) | -1.5                    | 90 <sup>a</sup>    | 100                | S7        |

<sup>a</sup> F.E. for FA<sup>b</sup> F.E. for MF<sup>c</sup> Total F.E. for MF and FA

## References:

- S1. A. Galarneau, D. Mehlhorn, F. Guenneau, B. Coasne, F. Villemot, D. Minoux, C. Aquino and J. P. Dath, *Langmuir*, 2018, **34**, 14134-14142.
- S2. S. Jung, A. N. Karaiskakis and E. J. Biddinger, *Catal. Today*, 2019, **323**, 26-34.
- S3. S. Jung and E. J. Biddinger, *ACS Sustainable Chem. Eng.*, 2016, **4**, 6500-6508.
- S4. Z. Li, S. Kelkar, C. H. Lam, K. Luczek, J. E. Jackson, D. J. Miller and C. M. Saffron, *Electrochim. Acta*, 2012, **64**, 87-93.
- S5. S. K. Green, J. Lee, H. J. Kim, G. A. Tompsett, W. B. Kim and G. W. Huber, *Green Chem.*, 2013, **15**, 1869-1879.
- S6. L. Liu, H. Liu, W. Huang, Y. He, W. Zhang, C. Wang and H. Lin, *J. Electroanal. Chem.*, 2017, **804**, 248-253.
- S7. X. Zhang, M. Han, G. Liu, G. Wang, Y. Zhang, H. Zhang and H. Zhao, *Appl. Catal., B*, 2019, **244**, 899-908.
